# Supplementary material for: High Ecological Health Risks of Potentially Toxic Metals in Polluted Drainage Sediments: Is There a Need for Public Concern during Flash Floods?
Source: MDPI journal article supplement (doi:10.3390/w14152316), 2022-07-26
Supplement: s1 [file s1]

# **High Ecological Health Risks of Potentially Toxic Metals in Polluted Drainage Sediments: Is There a Need for Public Concern during Flash Floods?**

**Chee Kong Yap <sup>1,\*</sup>, and Khalid Awadh Al-Mutairi <sup>2</sup>**

<sup>1</sup> Department of Biology, Faculty of Science, Universiti Putra Malaysia, Serdang 43400 UPM, Malaysia;

<sup>2</sup> Department of Biology, Faculty of Science, University of Tabuk, Tabuk, P.O. Box 741, Saudi Arabia; kmutairi@ut.edu.sa

\* Correspondence: yapckong@hotmail.com or yapchee@upm.edu.my

Table S1. Site descriptions of surface sediments were collected from the Malacca Industrial Area and Malacca River drainages.

| Sampling site no. | Sites    | GPS                 | Description of sampling site                                                                                |
|-------------------|----------|---------------------|-------------------------------------------------------------------------------------------------------------|
| 1                 | Drainage | 2.26843; 102.29511  | (Power Weld) Near an electrode products factory.                                                            |
| 2                 | Drainage | 2.25786; 102.29331  | (Everts) Near a balloon manufacture factory                                                                 |
| 3                 | River    | 2.24507; 102.24832  | Batu Berendam Bridge at Malacca River, near an industrial area.                                             |
| 4                 | River    | 2.24555; 102.24602  | Malacca River; is an industrial area and residential area.                                                  |
| 5                 | River    | 2.20824; 102.25157  | Hang Jebat Bridge at Malacca River; is an urban residential and tourist area.                               |
| 6                 | River    | 2.24664; 102.23970  | Malim Bridge (Jambatan Jalan Industri Malim Jaya) at Malacca River; industrial area, and residential areas. |
| 7                 | Drainage | 2.26003; 102.24206  | (Omega) Near a semi-conductor factory                                                                       |
| 8                 | Drainage | 2.24593; 102.25669  | (Sam Chang) Near a semiconductor factory                                                                    |
| 9                 | Drainage | 2.26887; 102.23110  | (Golsta) Near a chemical production factory                                                                 |
| 10                | Drainage | 2.26912; 102.23096  | (El Mega) Near an aluminium production factory                                                              |
| 11                | Coast    | 2.11398; 102.14708  | Malacca Jetty; An active jetty.                                                                             |
| 12                | Coast    | 2.184038; 102.24393 | Bandar Hilir beach; is a rocky and sandy beach                                                              |

Table S2. Heavy metals analysis recovery percentages of the certified reference materials (CRM).

| CRM                    | Cd   | Cu    | Fe    | Ni   | Pb    | Zn    |
|------------------------|------|-------|-------|------|-------|-------|
| TH-1 Sediment Canada   | 102% | 92.9% | 95.6% | 112% | 100%  | 110%  |
| SRM 1547               | NA   | NA    | 106%  | NA   | NA    | 115%  |
| IAEA Soil-5            | 156% | 91.3% | NA    | 103% | 116%  | 94.8% |
| NSC DC73319 Soil China | 111% | 85.0% | NA    | NA   | 99.8% | 99.7% |
| MESS-3 NRC             | NA   | 93.1% | NA    | 102% | 116%  | 82.8% |

NA—data not available.

**Table S3.** Overall statistics of percentages (%) of fractions of EFLE (F1), acid-reducible (F2), oxidizable-organic (F3), resistant (F4), non-resistant (NR), and ratios of non-resistant to resistant (NR/R), values of enrichment factor (EF), geoaccumulation index ( $I_{geo}$ ), contamination factor (CF), ecological risk (ER) for Cd, Cu, Ni, Pb, and Zn, of sediments, collected from the coast (N= 2), river (N= 6) and drainage (N= 6) in Malacca, Peninsular Malaysia.

| Cd coast    | F1%   | F2%   | F3%   | F4%   | NR%   | NR/R | EF    | $I_{geo}$ | CF     | ER     |
|-------------|-------|-------|-------|-------|-------|------|-------|-----------|--------|--------|
| Min         | 6.91  | 6.16  | 1.75  | 80.99 | 15.00 | 0.18 | 8.71  | 2.65      | 9.43   | 283    |
| Max         | 7.97  | 9.29  | 1.93  | 85.00 | 19.01 | 0.23 | 11.1  | 3.24      | 14.21  | 426    |
| Mean        | 7.44  | 7.72  | 1.84  | 82.99 | 17.01 | 0.21 | 9.89  | 2.95      | 11.82  | 355    |
| Median      | 7.44  | 7.72  | 1.84  | 82.99 | 17.01 | 0.21 | 9.89  | 2.95      | 11.82  | 355    |
| SD          | 0.75  | 2.21  | 0.13  | 2.84  | 2.84  | 0.04 | 1.67  | 0.42      | 3.38   | 102    |
| SE          | 0.53  | 1.57  | 0.09  | 2.01  | 2.01  | 0.02 | 1.18  | 0.29      | 2.39   | 71.8   |
| Cd drainage | F1%   | F2%   | F3%   | F4%   | NR%   | NR/R | EF    | $I_{geo}$ | CF     | ER     |
| Min         | 5.85  | 29.50 | 15.87 | 13.56 | 60.32 | 1.52 | 16.5  | 4.05      | 24.80  | 744    |
| Max         | 15.35 | 61.17 | 24.14 | 39.68 | 86.44 | 6.37 | 54.3  | 5.52      | 68.72  | 2062   |
| Mean        | 11.00 | 38.83 | 19.90 | 30.27 | 69.74 | 2.74 | 28.2  | 4.62      | 39.20  | 1176   |
| Median      | 10.68 | 35.63 | 19.26 | 32.04 | 67.96 | 2.13 | 22.2  | 4.59      | 36.27  | 1088   |
| SD          | 3.25  | 11.52 | 3.07  | 9.02  | 9.02  | 1.81 | 13.9  | 0.53      | 16.04  | 481    |
| SE          | 1.33  | 4.70  | 1.25  | 3.68  | 3.68  | 0.74 | 5.70  | 0.22      | 6.55   | 196    |
| Cd river    | F1%   | F2%   | F3%   | F4%   | NR%   | NR/R | EF    | $I_{geo}$ | CF     | ER     |
| Min         | 11.17 | 37.86 | 23.30 | 22.34 | 72.33 | 2.61 | 15.4  | 3.62      | 18.43  | 553    |
| Max         | 14.22 | 39.88 | 25.00 | 27.67 | 77.66 | 3.48 | 40.8  | 3.95      | 23.24  | 697    |
| Mean        | 13.14 | 38.96 | 23.88 | 24.02 | 75.98 | 3.20 | 29.5  | 3.84      | 21.52  | 646    |
| Median      | 13.59 | 39.05 | 23.62 | 23.04 | 76.97 | 3.35 | 30.8  | 3.89      | 22.21  | 666    |
| SD          | 1.37  | 0.87  | 0.76  | 2.49  | 2.49  | 0.40 | 10.9  | 0.15      | 2.16   | 64.8   |
| SE          | 0.68  | 0.43  | 0.38  | 1.24  | 1.24  | 0.20 | 5.48  | 0.07      | 1.08   | 32.4   |
| Cu coast    | F1%   | F2%   | F3%   | F4%   | NR%   | NR/R | EF    | $I_{geo}$ | CF     | ER     |
| Min         | 0.92  | 0.10  | 18.70 | 59.55 | 24.06 | 0.32 | 0.52  | -1.42     | 0.56   | 2.81   |
| Max         | 1.87  | 3.50  | 39.44 | 75.94 | 40.45 | 0.68 | 2.40  | 1.04      | 3.08   | 15.38  |
| Mean        | 1.40  | 1.80  | 29.07 | 67.75 | 32.26 | 0.50 | 1.46  | -0.19     | 1.82   | 9.10   |
| Median      | 1.40  | 1.80  | 29.07 | 67.75 | 32.26 | 0.50 | 1.46  | -0.19     | 1.82   | 9.10   |
| SD          | 0.67  | 2.40  | 14.67 | 11.59 | 11.59 | 0.25 | 1.33  | 1.74      | 1.78   | 8.89   |
| SE          | 0.47  | 1.70  | 10.37 | 8.20  | 8.20  | 0.18 | 0.94  | 1.23      | 1.26   | 6.29   |
| Cu drainage | F1%   | F2%   | F3%   | F4%   | NR%   | NR/R | EF    | $I_{geo}$ | CF     | ER     |
| Min         | 0.36  | 0.18  | 43.15 | 27.61 | 49.64 | 0.99 | 5.17  | 2.25      | 7.13   | 35.66  |
| Max         | 28.72 | 1.50  | 64.49 | 50.36 | 72.39 | 2.62 | 92.37 | 6.30      | 118.15 | 590.73 |
| Mean        | 6.66  | 0.82  | 53.73 | 38.79 | 61.21 | 1.68 | 35.29 | 4.02      | 47.16  | 235.81 |
| Median      | 1.19  | 0.87  | 54.94 | 37.43 | 62.56 | 1.69 | 9.99  | 3.44      | 16.47  | 82.35  |
| SD          | 11.20 | 0.59  | 7.63  | 8.17  | 8.17  | 0.58 | 42.76 | 1.84      | 54.71  | 273.54 |
| SE          | 4.57  | 0.24  | 3.12  | 3.34  | 3.34  | 0.24 | 17.46 | 0.75      | 22.33  | 111.67 |
| Cu River    | F1%   | F2%   | F3%   | F4%   | NR%   | NR/R | EF    | $I_{geo}$ | CF     | ER     |
| Min         | 1.04  | 0.63  | 31.95 | 21.84 | 37.08 | 0.59 | 1.65  | -0.18     | 1.32   | 6.61   |
| Max         | 3.59  | 2.76  | 73.22 | 62.92 | 78.16 | 3.58 | 71.28 | 4.76      | 40.56  | 202.80 |
| Mean        | 2.27  | 1.76  | 55.24 | 40.74 | 59.26 | 1.86 | 24.78 | 2.62      | 16.31  | 81.55  |
| Median      | 2.22  | 1.82  | 57.89 | 39.09 | 60.91 | 1.63 | 13.10 | 2.94      | 11.68  | 58.39  |
| SD          | 1.16  | 0.95  | 17.65 | 17.71 | 17.71 | 1.30 | 31.50 | 2.06      | 16.96  | 84.82  |
| SE          | 0.58  | 0.48  | 8.82  | 8.85  | 8.85  | 0.65 | 15.75 | 1.03      | 8.48   | 42.41  |
| Ni coast    | F1%   | F2%   | F3%   | F4%   | NR%   | NR/R | EF    | $I_{geo}$ | CF     | ER     |
| Min         | 2.48  | 6.57  | 12.58 | 61.43 | 31.15 | 0.45 | 0.83  | -0.75     | 0.89   | 1.79   |
| Max         | 3.57  | 15.00 | 29.51 | 68.85 | 38.57 | 0.63 | 1.20  | 0.03      | 1.53   | 3.07   |
| Mean        | 3.03  | 10.79 | 21.05 | 65.14 | 34.86 | 0.54 | 1.01  | -0.36     | 1.21   | 2.43   |
| Median      | 3.03  | 10.79 | 21.05 | 65.14 | 34.86 | 0.54 | 1.01  | -0.36     | 1.21   | 2.43   |
| SD          | 0.77  | 5.96  | 11.97 | 5.25  | 5.25  | 0.13 | 0.26  | 0.55      | 0.45   | 0.91   |
| SE          | 0.54  | 4.21  | 8.47  | 3.71  | 3.71  | 0.09 | 0.18  | 0.39      | 0.32   | 0.64   |
| Ni Drainage | F1%   | F2%   | F3%   | F4%   | NR%   | NR/R | EF    | $I_{geo}$ | CF     | ER     |
| Min         | 0.13  | 3.10  | 24.89 | 20.23 | 36.11 | 0.57 | 0.93  | -0.10     | 1.40   | 2.80   |
| Max         | 19.72 | 17.23 | 55.57 | 63.89 | 79.77 | 3.94 | 34.22 | 4.93      | 45.70  | 91.40  |
| Mean        | 5.95  | 9.44  | 41.93 | 42.68 | 57.32 | 1.72 | 9.02  | 2.21      | 12.40  | 24.80  |
| Median      | 3.30  | 8.28  | 45.20 | 40.21 | 59.80 | 1.49 | 4.71  | 2.30      | 7.39   | 14.79  |
| SD          | 7.33  | 4.92  | 12.23 | 16.72 | 16.72 | 1.24 | 12.51 | 1.66      | 16.56  | 33.11  |
| SE          | 2.99  | 2.01  | 4.99  | 6.83  | 6.83  | 0.51 | 5.11  | 0.68      | 6.76   | 13.52  |
| Ni river    | F1%   | F2%   | F3%   | F4%   | NR%   | NR/R | EF    | $I_{geo}$ | CF     | ER     |
| Min         | 2.12  | 16.46 | 47.50 | 12.72 | 72.52 | 2.64 | 0.88  | -1.09     | 0.70   | 1.41   |
| Max         | 17.91 | 22.89 | 58.29 | 27.48 | 87.28 | 6.86 | 20.98 | 2.99      | 11.94  | 23.87  |
| Mean        | 7.17  | 18.87 | 53.35 | 20.61 | 79.39 | 4.29 | 6.69  | 0.73      | 4.23   | 8.47   |
| Median      | 4.33  | 18.07 | 53.81 | 21.11 | 78.89 | 3.83 | 2.45  | 0.51      | 2.15   | 4.30   |
| SD          | 7.23  | 2.94  | 4.50  | 6.50  | 6.50  | 1.88 | 9.56  | 1.69      | 5.18   | 10.37  |
| SE          | 3.62  | 1.47  | 2.25  | 3.25  | 3.25  | 0.94 | 4.78  | 0.85      | 2.59   | 5.18   |
| Pb coast    | F1%   | F2%   | F3%   | F4%   | NR%   | NR/R | EF    | $I_{geo}$ | CF     | ER     |
| Min         | 7.15  | 0.01  | 22.86 | 60.84 | 37.23 | 0.59 | 1.75  | 0.34      | 1.90   | 9.47   |
| Max         | 10.40 | 7.21  | 28.74 | 62.77 | 39.16 | 0.64 | 2.73  | 1.22      | 3.50   | 17.49  |

|             |       |       |       |       |       |      |       |       |       |       |
|-------------|-------|-------|-------|-------|-------|------|-------|-------|-------|-------|
| Mean        | 8.77  | 3.61  | 25.80 | 61.81 | 38.20 | 0.61 | 2.24  | 0.78  | 2.70  | 13.48 |
| Median      | 8.77  | 3.61  | 25.80 | 61.81 | 38.20 | 0.61 | 2.24  | 0.78  | 2.70  | 13.48 |
| SD          | 2.30  | 5.09  | 4.16  | 1.36  | 1.36  | 0.04 | 0.69  | 0.62  | 1.13  | 5.67  |
| SE          | 1.62  | 3.60  | 2.94  | 0.97  | 0.97  | 0.03 | 0.49  | 0.44  | 0.80  | 4.01  |
| Pb drainage | F1%   | F2%   | F3%   | F4%   | NR%   | NR/R | EF    | Igeo  | CF    | ER    |
| Min         | 1.03  | 8.06  | 5.46  | 29.45 | 27.75 | 0.38 | 2.69  | 1.15  | 3.32  | 16.62 |
| Max         | 5.40  | 25.86 | 48.06 | 72.25 | 70.55 | 2.40 | 13.52 | 3.59  | 18.06 | 90.29 |
| Mean        | 3.15  | 16.64 | 26.57 | 53.65 | 46.35 | 1.02 | 5.61  | 2.18  | 7.94  | 39.70 |
| Median      | 3.16  | 17.01 | 29.24 | 55.53 | 44.48 | 0.81 | 4.30  | 2.13  | 6.67  | 33.37 |
| SD          | 1.74  | 5.82  | 16.62 | 14.17 | 14.17 | 0.71 | 4.03  | 0.85  | 5.31  | 26.54 |
| SE          | 0.71  | 2.38  | 6.79  | 5.79  | 5.79  | 0.29 | 1.64  | 0.35  | 2.17  | 10.83 |
| Pb river    | F1%   | F2%   | F3%   | F4%   | NR%   | NR/R | EF    | Igeo  | CF    | ER    |
| Min         | 1.75  | 13.91 | 41.36 | 28.85 | 58.29 | 1.40 | 3.65  | 1.54  | 4.38  | 21.88 |
| Max         | 2.75  | 19.64 | 51.99 | 41.71 | 71.15 | 2.47 | 9.35  | 1.83  | 5.32  | 26.59 |
| Mean        | 2.38  | 16.18 | 48.50 | 32.96 | 67.04 | 2.10 | 6.81  | 1.73  | 4.99  | 24.97 |
| Median      | 2.50  | 15.58 | 50.32 | 30.64 | 69.36 | 2.27 | 7.12  | 1.78  | 5.14  | 25.71 |
| SD          | 0.43  | 2.62  | 4.99  | 5.97  | 5.97  | 0.49 | 2.43  | 0.13  | 0.42  | 2.10  |
| SE          | 0.22  | 1.31  | 2.49  | 2.98  | 2.98  | 0.24 | 1.21  | 0.06  | 0.21  | 1.05  |
| Zn coast    | F1%   | F2%   | F3%   | F4%   | NR%   | NR/R | EF    | Igeo  | CF    | ER    |
| Min         | 1.32  | 6.34  | 9.15  | 67.34 | 17.97 | 0.22 | 0.62  | -1.16 | 0.67  | 0.67  |
| Max         | 1.75  | 21.76 | 10.32 | 82.03 | 32.66 | 0.49 | 1.88  | 0.69  | 2.42  | 2.42  |
| Mean        | 1.54  | 14.05 | 9.73  | 74.68 | 25.32 | 0.36 | 1.25  | -0.23 | 1.54  | 1.55  |
| Median      | 1.54  | 14.05 | 9.73  | 74.68 | 25.32 | 0.36 | 1.25  | -0.23 | 1.54  | 1.55  |
| SD          | 0.30  | 10.90 | 0.83  | 10.39 | 10.39 | 0.19 | 0.89  | 1.31  | 1.23  | 1.24  |
| SE          | 0.21  | 7.71  | 0.59  | 7.35  | 7.35  | 0.14 | 0.63  | 0.92  | 0.87  | 0.88  |
| Zn drainage | F1%   | F2%   | F3%   | F4%   | NR%   | NR/R | EF    | Igeo  | CF    | ER    |
| Min         | 7.12  | 21.80 | 23.50 | 15.16 | 77.33 | 3.41 | 2.97  | 1.57  | 4.45  | 4.45  |
| Max         | 39.55 | 37.78 | 32.43 | 22.67 | 84.84 | 5.60 | 4.74  | 2.00  | 6.00  | 6.00  |
| Mean        | 28.82 | 27.47 | 26.22 | 17.50 | 82.50 | 4.82 | 3.94  | 1.89  | 5.58  | 5.58  |
| Median      | 31.87 | 26.08 | 25.13 | 17.21 | 82.80 | 4.81 | 4.00  | 1.93  | 5.72  | 5.72  |
| SD          | 11.44 | 5.53  | 3.27  | 2.75  | 2.75  | 0.80 | 0.62  | 0.16  | 0.57  | 0.57  |
| SE          | 4.67  | 2.26  | 1.34  | 1.12  | 1.12  | 0.33 | 0.25  | 0.07  | 0.23  | 0.23  |
| Zn river    | F1%   | F2%   | F3%   | F4%   | NR%   | NR/R | EF    | Igeo  | CF    | ER    |
| Min         | 2.61  | 28.69 | 28.10 | 14.68 | 78.72 | 3.70 | 1.80  | -0.05 | 1.45  | 1.45  |
| Max         | 28.53 | 41.46 | 36.02 | 21.28 | 85.32 | 5.81 | 8.61  | 1.71  | 4.90  | 4.90  |
| Mean        | 12.51 | 36.39 | 33.21 | 17.90 | 82.11 | 4.72 | 4.73  | 1.04  | 3.36  | 3.36  |
| Median      | 9.45  | 37.70 | 34.35 | 17.81 | 82.19 | 4.68 | 4.24  | 1.24  | 3.54  | 3.55  |
| SD          | 11.16 | 5.52  | 3.50  | 3.13  | 3.13  | 1.00 | 3.07  | 0.76  | 1.43  | 1.43  |
| SE          | 5.58  | 2.76  | 1.75  | 1.57  | 1.57  | 0.50 | 1.54  | 0.38  | 0.72  | 0.72  |

Note: Min= minimum; Max= maximum; SD= standard deviation; SE= standard error.

**Table S4:** Overall statistics of the values of hazard quotient (HQ), and hazard index (HI), in the three exposure routes of Cd, Ni, Cu, Pb, and Zn in children (C) and adults (A) separated into coastal, drainage and river from the present study.

| Cd coast    | A HQ <sub>ing</sub> | A HQ <sub>inh</sub> | A HQ <sub>der</sub> | A HI     | C HQ <sub>ing</sub> | C HQ <sub>inh</sub> | C HQ <sub>der</sub> | C HI     |
|-------------|---------------------|---------------------|---------------------|----------|---------------------|---------------------|---------------------|----------|
| Min         | 1.42E-03            | 1.31E-07            | 4.34E-03            | 5.76E-03 | 1.16E-02            | 3.17E-07            | 1.86E-03            | 1.35E-02 |
| Max         | 2.15E-03            | 1.97E-07            | 6.54E-03            | 8.69E-03 | 1.75E-02            | 4.78E-07            | 2.80E-03            | 2.03E-02 |
| Mean        | 1.79E-03            | 1.64E-07            | 5.44E-03            | 7.22E-03 | 1.46E-02            | 3.98E-07            | 2.33E-03            | 1.69E-02 |
| Median      | 1.79E-03            | 1.64E-07            | 5.44E-03            | 7.22E-03 | 1.46E-02            | 3.98E-07            | 2.33E-03            | 1.69E-02 |
| SD          | 5.16E-04            | 4.67E-08            | 1.56E-03            | 2.07E-03 | 4.17E-03            | 1.14E-07            | 6.65E-04            | 4.81E-03 |
| SE          | 3.65E-04            | 3.30E-08            | 1.10E-03            | 1.46E-03 | 2.95E-03            | 8.05E-08            | 4.70E-04            | 3.40E-03 |
| Cd drainage |                     |                     |                     |          |                     |                     |                     |          |
| Min         | 3.75E-03            | 3.44E-07            | 1.14E-02            | 1.52E-02 | 3.05E-02            | 8.35E-07            | 4.88E-03            | 3.54E-02 |
| Max         | 1.04E-02            | 9.53E-07            | 3.16E-02            | 4.20E-02 | 8.46E-02            | 2.31E-06            | 1.35E-02            | 9.81E-02 |
| Mean        | 5.93E-03            | 5.44E-07            | 1.80E-02            | 2.40E-02 | 4.82E-02            | 1.32E-06            | 7.71E-03            | 5.60E-02 |
| Median      | 5.48E-03            | 5.04E-07            | 1.67E-02            | 2.22E-02 | 4.46E-02            | 1.22E-06            | 7.14E-03            | 5.18E-02 |
| SD          | 2.43E-03            | 2.22E-07            | 7.38E-03            | 9.80E-03 | 1.98E-02            | 5.38E-07            | 3.15E-03            | 2.29E-02 |
| SE          | 9.91E-04            | 9.08E-08            | 3.01E-03            | 4.00E-03 | 8.06E-03            | 2.20E-07            | 1.28E-03            | 9.35E-03 |
| Cd river    |                     |                     |                     |          |                     |                     |                     |          |
| Min         | 2.79E-03            | 2.56E-07            | 8.48E-03            | 1.13E-02 | 2.27E-02            | 6.20E-07            | 3.63E-03            | 2.63E-02 |
| Max         | 3.51E-03            | 3.22E-07            | 1.07E-02            | 1.42E-02 | 2.86E-02            | 7.82E-07            | 4.57E-03            | 3.32E-02 |
| Mean        | 3.25E-03            | 2.99E-07            | 9.91E-03            | 1.32E-02 | 2.65E-02            | 7.24E-07            | 4.24E-03            | 3.07E-02 |
| Median      | 3.35E-03            | 3.09E-07            | 1.02E-02            | 1.36E-02 | 2.74E-02            | 7.48E-07            | 4.38E-03            | 3.17E-02 |
| SD          | 3.24E-04            | 2.98E-08            | 1.00E-03            | 1.30E-03 | 2.65E-03            | 7.30E-08            | 4.24E-04            | 3.10E-03 |
| SE          | 1.62E-04            | 1.49E-08            | 5.02E-04            | 6.51E-04 | 1.33E-03            | 3.65E-08            | 2.12E-04            | 1.55E-03 |
| Cu coast    |                     |                     |                     |          |                     |                     |                     |          |
| Min         | 2.97E-04            | 2.71E-08            | 3.02E-05            | 3.27E-04 | 2.42E-03            | 6.59E-08            | 1.29E-05            | 2.43E-03 |
| Max         | 1.63E-03            | 1.49E-07            | 1.65E-04            | 1.79E-03 | 1.33E-02            | 3.61E-07            | 7.07E-05            | 1.33E-02 |
| Mean        | 9.63E-04            | 8.81E-08            | 9.76E-05            | 1.06E-03 | 7.86E-03            | 2.13E-07            | 4.18E-05            | 7.86E-03 |
| Median      | 9.63E-04            | 8.81E-08            | 9.76E-05            | 1.06E-03 | 7.86E-03            | 2.13E-07            | 4.18E-05            | 7.86E-03 |
| SD          | 9.43E-04            | 8.62E-08            | 9.53E-05            | 1.03E-03 | 7.69E-03            | 2.09E-07            | 4.09E-05            | 7.69E-03 |
| SE          | 6.66E-04            | 6.10E-08            | 6.74E-05            | 7.32E-04 | 5.44E-03            | 1.48E-07            | 2.89E-05            | 5.43E-03 |
| Cu drainage |                     |                     |                     |          |                     |                     |                     |          |
| Min         | 3.78E-03            | 3.45E-07            | 3.83E-04            | 4.16E-03 | 3.08E-02            | 8.37E-07            | 1.64E-04            | 3.09E-02 |
| Max         | 6.26E-02            | 5.72E-06            | 6.35E-03            | 6.89E-02 | 5.09E-01            | 1.39E-05            | 2.72E-03            | 5.12E-01 |
| Mean        | 2.50E-02            | 2.28E-06            | 2.54E-03            | 2.75E-02 | 2.03E-01            | 5.54E-06            | 1.09E-03            | 2.04E-01 |
| Median      | 8.72E-03            | 7.97E-07            | 8.87E-04            | 9.59E-03 | 7.10E-02            | 1.93E-06            | 3.79E-04            | 7.14E-02 |
| SD          | 2.90E-02            | 2.65E-06            | 2.94E-03            | 3.19E-02 | 2.36E-01            | 6.42E-06            | 1.26E-03            | 2.37E-01 |
| SE          | 1.18E-02            | 1.08E-06            | 1.20E-03            | 1.30E-02 | 9.62E-02            | 2.62E-06            | 5.14E-04            | 9.68E-02 |
| Cu River    |                     |                     |                     |          |                     |                     |                     |          |
| Min         | 7.00E-04            | 6.39E-08            | 7.11E-05            | 7.71E-04 | 5.70E-03            | 1.55E-07            | 3.04E-05            | 5.73E-03 |
| Max         | 2.15E-02            | 1.96E-06            | 2.18E-03            | 2.37E-02 | 1.75E-01            | 4.76E-06            | 9.33E-04            | 1.76E-01 |
| Mean        | 8.64E-03            | 7.88E-07            | 8.77E-04            | 9.53E-03 | 7.04E-02            | 1.91E-06            | 3.75E-04            | 7.07E-02 |
| Median      | 6.19E-03            | 5.65E-07            | 6.28E-04            | 6.82E-03 | 5.04E-02            | 1.37E-06            | 2.69E-04            | 5.06E-02 |
| SD          | 8.99E-03            | 8.20E-07            | 9.12E-04            | 9.91E-03 | 7.32E-02            | 1.99E-06            | 3.90E-04            | 7.36E-02 |
| SE          | 4.50E-03            | 4.10E-07            | 4.56E-04            | 4.96E-03 | 3.66E-02            | 9.95E-07            | 1.95E-04            | 3.68E-02 |
| Ni coast    |                     |                     |                     |          |                     |                     |                     |          |
| Min         | 1.23E-03            | 1.10E-07            | 1.39E-04            | 1.37E-03 | 1.00E-02            | 2.66E-07            | 5.94E-05            | 1.01E-02 |
| Max         | 2.11E-03            | 1.88E-07            | 2.38E-04            | 2.35E-03 | 1.72E-02            | 4.57E-07            | 1.02E-04            | 1.73E-02 |
| Mean        | 1.67E-03            | 1.49E-07            | 1.88E-04            | 1.86E-03 | 1.36E-02            | 3.62E-07            | 8.07E-05            | 1.37E-02 |
| Median      | 1.67E-03            | 1.49E-07            | 1.88E-04            | 1.86E-03 | 1.36E-02            | 3.62E-07            | 8.07E-05            | 1.37E-02 |
| SD          | 6.22E-04            | 5.52E-08            | 7.00E-05            | 6.93E-04 | 5.09E-03            | 1.35E-07            | 3.01E-05            | 5.09E-03 |
| SE          | 4.40E-04            | 3.90E-08            | 4.95E-05            | 4.90E-04 | 3.60E-03            | 9.55E-08            | 2.13E-05            | 3.60E-03 |
| Ni Drainage |                     |                     |                     |          |                     |                     |                     |          |
| Min         | 1.93E-03            | 1.72E-07            | 2.17E-04            | 2.14E-03 | 1.57E-02            | 4.17E-07            | 9.29E-05            | 1.58E-02 |
| Max         | 6.30E-02            | 5.61E-06            | 7.10E-03            | 7.01E-02 | 5.13E-01            | 1.36E-05            | 3.04E-03            | 5.16E-01 |
| Mean        | 1.71E-02            | 1.52E-06            | 1.93E-03            | 1.90E-02 | 1.39E-01            | 3.69E-06            | 8.25E-04            | 1.40E-01 |
| Median      | 1.02E-02            | 9.08E-07            | 1.15E-03            | 1.13E-02 | 8.30E-02            | 2.21E-06            | 4.92E-04            | 8.35E-02 |
| SD          | 2.28E-02            | 2.03E-06            | 2.57E-03            | 2.54E-02 | 1.86E-01            | 4.93E-06            | 1.10E-03            | 1.87E-01 |
| SE          | 9.32E-03            | 8.30E-07            | 1.05E-03            | 1.04E-02 | 7.59E-02            | 2.01E-06            | 4.50E-04            | 7.63E-02 |
| Ni river    |                     |                     |                     |          |                     |                     |                     |          |
| Min         | 9.70E-04            | 8.65E-08            | 1.09E-04            | 1.08E-03 | 7.90E-03            | 2.10E-07            | 4.68E-05            | 7.95E-03 |
| Max         | 1.64E-02            | 1.47E-06            | 1.85E-03            | 1.83E-02 | 1.34E-01            | 3.56E-06            | 7.93E-04            | 1.35E-01 |
| Mean        | 5.82E-03            | 5.21E-07            | 6.57E-04            | 6.49E-03 | 4.75E-02            | 1.26E-06            | 2.81E-04            | 4.79E-02 |

|             |                     |                     |                     |          |                     |                     |                     |          |
|-------------|---------------------|---------------------|---------------------|----------|---------------------|---------------------|---------------------|----------|
| Median      | 2.96E-03            | 2.64E-07            | 3.33E-04            | 3.29E-03 | 2.41E-02            | 6.40E-07            | 1.43E-04            | 2.43E-02 |
| SD          | 7.12E-03            | 6.39E-07            | 8.03E-04            | 7.95E-03 | 5.82E-02            | 1.55E-06            | 3.44E-04            | 5.86E-02 |
| SE          | 3.56E-03            | 3.19E-07            | 4.02E-04            | 3.97E-03 | 2.91E-02            | 7.73E-07            | 1.72E-04            | 2.93E-02 |
| Pb coast    | A HQ <sub>ing</sub> | A HQ <sub>inh</sub> | A HQ <sub>der</sub> | A HI     | C HQ <sub>ing</sub> | C HQ <sub>inh</sub> | C HQ <sub>der</sub> | C HI     |
| Min         | 1.36E-02            | 1.24E-06            | 2.77E-03            | 1.64E-02 | 1.11E-01            | 3.02E-06            | 1.18E-03            | 1.12E-01 |
| Max         | 2.52E-02            | 2.30E-06            | 5.11E-03            | 3.03E-02 | 2.05E-01            | 5.58E-06            | 2.19E-03            | 2.07E-01 |
| Mean        | 1.94E-02            | 1.77E-06            | 3.94E-03            | 2.34E-02 | 1.58E-01            | 4.30E-06            | 1.69E-03            | 1.60E-01 |
| Median      | 1.94E-02            | 1.77E-06            | 3.94E-03            | 2.34E-02 | 1.58E-01            | 4.30E-06            | 1.69E-03            | 1.60E-01 |
| SD          | 8.20E-03            | 7.50E-07            | 1.65E-03            | 9.83E-03 | 6.65E-02            | 1.81E-06            | 7.14E-04            | 6.72E-02 |
| SE          | 5.80E-03            | 5.30E-07            | 1.17E-03            | 6.95E-03 | 4.70E-02            | 1.28E-06            | 5.05E-04            | 4.75E-02 |
| Pb drainage |                     |                     |                     |          |                     |                     |                     |          |
| Minimum     | 2.39E-02            | 2.18E-06            | 4.86E-03            | 2.88E-02 | 1.95E-01            | 5.30E-06            | 2.08E-03            | 1.97E-01 |
| Maximum     | 1.30E-01            | 1.19E-05            | 2.64E-02            | 1.56E-01 | 1.06E+00            | 2.88E-05            | 1.13E-02            | 1.07E+00 |
| Mean        | 5.71E-02            | 5.22E-06            | 1.16E-02            | 6.87E-02 | 4.65E-01            | 1.27E-05            | 4.97E-03            | 4.71E-01 |
| Median      | 4.80E-02            | 4.39E-06            | 9.73E-03            | 5.78E-02 | 3.91E-01            | 1.07E-05            | 4.17E-03            | 3.96E-01 |
| SD          | 3.82E-02            | 3.50E-06            | 7.76E-03            | 4.58E-02 | 3.12E-01            | 8.46E-06            | 3.32E-03            | 3.15E-01 |
| SE          | 1.56E-02            | 1.43E-06            | 3.17E-03            | 1.87E-02 | 1.27E-01            | 3.46E-06            | 1.36E-03            | 1.28E-01 |
| Pb river    |                     |                     |                     |          |                     |                     |                     |          |
| Min         | 3.15E-02            | 2.87E-06            | 6.39E-03            | 3.79E-02 | 2.56E-01            | 6.98E-06            | 2.74E-03            | 2.59E-01 |
| Max         | 3.83E-02            | 3.49E-06            | 7.77E-03            | 4.60E-02 | 3.12E-01            | 8.48E-06            | 3.32E-03            | 3.15E-01 |
| Mean        | 3.59E-02            | 3.28E-06            | 7.30E-03            | 4.32E-02 | 2.93E-01            | 7.96E-06            | 3.12E-03            | 2.96E-01 |
| Median      | 3.70E-02            | 3.38E-06            | 7.51E-03            | 4.45E-02 | 3.01E-01            | 8.19E-06            | 3.22E-03            | 3.05E-01 |
| SD          | 3.03E-03            | 2.77E-07            | 6.16E-04            | 3.62E-03 | 2.50E-02            | 6.69E-07            | 2.60E-04            | 2.50E-02 |
| SE          | 1.52E-03            | 1.39E-07            | 3.08E-04            | 1.81E-03 | 1.25E-02            | 3.34E-07            | 1.30E-04            | 1.25E-02 |
| Zn coast    | A HQ <sub>ing</sub> | A HQ <sub>inh</sub> | A HQ <sub>der</sub> | A HI     | C HQ <sub>ing</sub> | C HQ <sub>inh</sub> | C HQ <sub>der</sub> | C HI     |
| Min         | 1.72E-04            | 1.58E-08            | 2.63E-05            | 1.99E-04 | 1.40E-03            | 3.84E-08            | 1.12E-05            | 1.42E-03 |
| Max         | 6.21E-04            | 5.70E-08            | 9.45E-05            | 7.15E-04 | 5.05E-03            | 1.38E-07            | 4.04E-05            | 5.09E-03 |
| Mean        | 3.97E-04            | 3.64E-08            | 6.04E-05            | 4.57E-04 | 3.22E-03            | 8.82E-08            | 2.58E-05            | 3.26E-03 |
| Median      | 3.97E-04            | 3.64E-08            | 6.04E-05            | 4.57E-04 | 3.22E-03            | 8.82E-08            | 2.58E-05            | 3.26E-03 |
| SD          | 3.17E-04            | 2.91E-08            | 4.82E-05            | 3.65E-04 | 2.58E-03            | 7.04E-08            | 2.06E-05            | 2.60E-03 |
| SE          | 2.25E-04            | 2.06E-08            | 3.41E-05            | 2.58E-04 | 1.82E-03            | 4.98E-08            | 1.46E-05            | 1.84E-03 |
| Zn drainage |                     |                     |                     |          |                     |                     |                     |          |
| Min         | 1.14E-03            | 1.05E-07            | 1.74E-04            | 1.32E-03 | 9.31E-03            | 2.55E-07            | 7.45E-05            | 9.39E-03 |
| Max         | 1.54E-03            | 1.42E-07            | 2.35E-04            | 1.78E-03 | 1.26E-02            | 3.43E-07            | 1.00E-04            | 1.27E-02 |
| Mean        | 1.43E-03            | 1.32E-07            | 2.18E-04            | 1.65E-03 | 1.17E-02            | 3.19E-07            | 9.32E-05            | 1.18E-02 |
| Median      | 1.47E-03            | 1.35E-07            | 2.24E-04            | 1.69E-03 | 1.20E-02            | 3.27E-07            | 9.56E-05            | 1.21E-02 |
| SD          | 1.47E-04            | 1.35E-08            | 2.23E-05            | 1.67E-04 | 1.20E-03            | 3.24E-08            | 9.44E-06            | 1.21E-03 |
| SE          | 6.02E-05            | 5.51E-09            | 9.08E-06            | 6.84E-05 | 4.89E-04            | 1.32E-08            | 3.85E-06            | 4.93E-04 |
| Zn river    |                     |                     |                     |          |                     |                     |                     |          |
| Min         | 3.72E-04            | 3.42E-08            | 5.67E-05            | 4.29E-04 | 3.03E-03            | 8.30E-08            | 2.43E-05            | 3.06E-03 |
| Max         | 1.26E-03            | 1.16E-07            | 1.92E-04            | 1.45E-03 | 1.02E-02            | 2.80E-07            | 8.20E-05            | 1.03E-02 |
| Mean        | 8.63E-04            | 7.93E-08            | 1.31E-04            | 9.95E-04 | 7.01E-03            | 1.92E-07            | 5.62E-05            | 7.07E-03 |
| Median      | 9.10E-04            | 8.35E-08            | 1.39E-04            | 1.05E-03 | 7.40E-03            | 2.03E-07            | 5.93E-05            | 7.47E-03 |
| SD          | 3.69E-04            | 3.40E-08            | 5.62E-05            | 4.25E-04 | 2.98E-03            | 8.19E-08            | 2.40E-05            | 3.01E-03 |
| SE          | 1.84E-04            | 1.70E-08            | 2.81E-05            | 2.12E-04 | 1.49E-03            | 4.09E-08            | 1.20E-05            | 1.50E-03 |
